# Supplementary material for: Effects of the Long-Term Continuous Cropping of Yongfeng Yam on the Bacterial Community and Function in the Rhizospheric Soil
Source: MDPI journal article supplement (doi:10.3390/microorganisms11020274), 2023-01-20

## Supplement Table and Figure

Table S1 The number of 16SrDNA sequences and sampling good's coverage of soil microbiome

| Samples  | No. of raw sequences | No. of clean sequences | Good's coverage (%) | No. of ASVs |
|----------|----------------------|------------------------|---------------------|-------------|
| YF_1Y_1  | 80478                | 67,040                 | 98.66               | 10,416      |
| YF_1Y_2  | 75511                | 68,591                 | 99.09               | 10,441      |
| YF_1Y_3  | 77454                | 47,912                 | 97.87               | 10,686      |
| YF_5Y_1  | 63583                | 39,637                 | 98.23               | 10,926      |
| YF_5Y_2  | 67142                | 45,273                 | 98.26               | 11,120      |
| YF_5Y_3  | 70106                | 48,117                 | 98.24               | 11,282      |
| YF_10Y_1 | 65966                | 46,378                 | 98.08               | 11,441      |
| YF_10Y_2 | 71281                | 47,778                 | 97.90               | 11,640      |
| YF_10Y_3 | 70649                | 45,970                 | 97.71               | 11,848      |
| YF_15Y_1 | 63030                | 38,816                 | 97.66               | 12,121      |
| YF_15Y_2 | 62733                | 40,150                 | 97.83               | 12,342      |
| YF_15Y_3 | 65959                | 42,286                 | 97.64               | 12,568      |
| YF_20Y_1 | 64713                | 34,843                 | 97.05               | 13,020      |
| YF_20Y_2 | 66329                | 35,430                 | 97.00               | 13,479      |
| YF_20Y_3 | 61063                | 29,924                 | 97.45               | 13,887      |

Figure S1 Veen diagram showing the number of unique bacterial detected in different continuous cropping time.

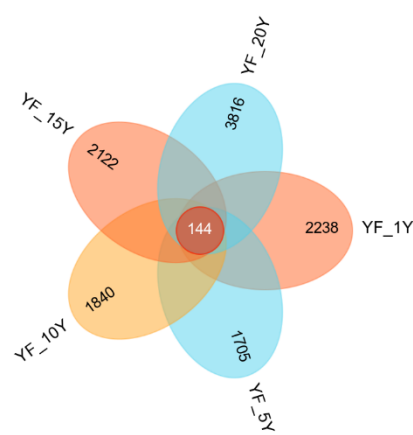

Supplement: s1 [file s1]
